# Supplementary material
Source: Springer Nature journal article supplement (https://www.springermedizin.de/resource/supplementary/13054_2013_2097_MOESM3_ESM.pdf/9711606)

**a**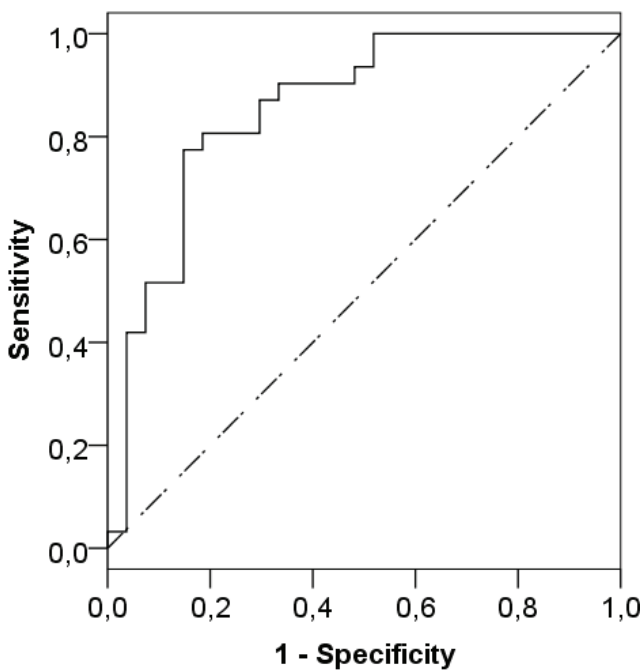**b**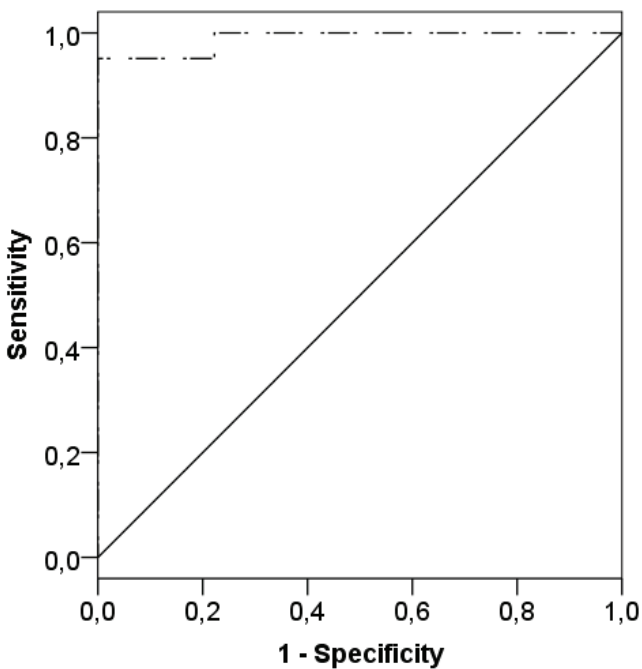

Supplement: MOESM3 [file 9711606]
